# Supplementary material for: Vascular endothelium function among male carriers of BRCA 1&2 germline mutation
Source: PubMed Central journal article supplement (PMC6707947; doi:10.18632/oncotarget.27118), 2019-08-20
Supplement: oncotarget-10-5041-s001.pdf [file oncotarget-10-5041-s001.pdf]

## Vascular endothelium function among male carriers of BRCA 1&2 germline mutation

### SUPPLEMENTARY MATERIALS

Supplementary Table 1: 15 known BRCA 1&2 founder mutations in Jews

| BRCA Mutation tested               |                                                     |
|------------------------------------|-----------------------------------------------------|
| BRCA1: nm_07284.2                  | Known clinical name (according to GenBank U14680.1) |
| p. E23VfsX17, c.68_69delAG         | 185delAG                                            |
| P. Q1756PfsX74, c.5266dupC         | 5382insC                                            |
| p. E1346KfsX20, C.4035delA         | 4153delA                                            |
| p. A1708E, c.5123C>A               | A1708E                                              |
| p. Y978×, c.2934T>G                | Y978X                                               |
| p. C61G, c.181T>G                  | 300T>G                                              |
| p. C328×, c.981delAT               | 1100delAT                                           |
| p. E720×, c.2158G>T                | E720X                                               |
| p. W1508×, c.4524>A                | W1508X                                              |
| BRCA2: nm_000059.3                 | Known clinical name (according to GenBank U43746)   |
| p. S1982RfsX22, c.5946delT         | 6174delT                                            |
| p. E2846GfsX22, c.8537_8538delAG   | 8765delAG                                           |
| p. V1283KfsX2, c.3847_3848delGT    | 4075delGT                                           |
| c.67+1G>A                          | IVS2+IG>A                                           |
| p. R2336P, c.7007G>C               | R2336P                                              |
| p. E1646QfsX23, c.4936_4939delGAAA | 5164del4                                            |

This table is based on data from the Cancer Information Core Database. <http://research.nhgri.nih.gov/projects/bic/>.

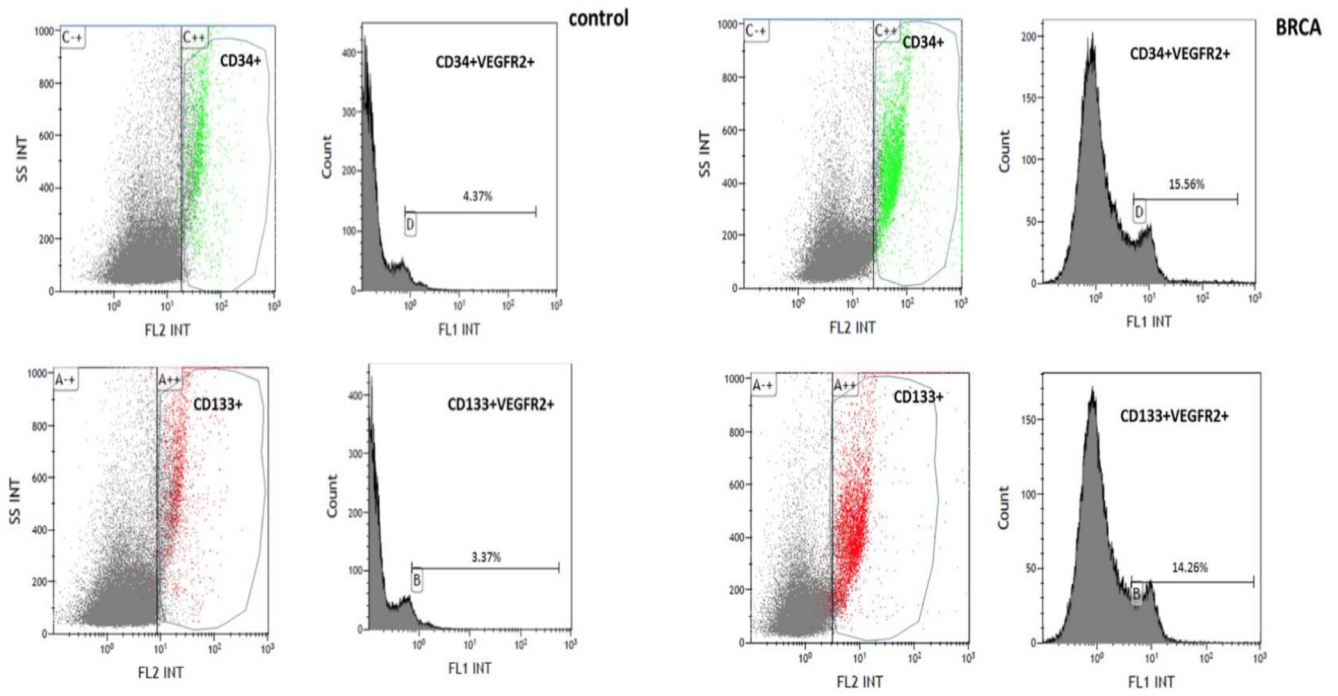

**Supplementary Figure 1: Representative FACS analysis for CD34+/VEGF-R2+ and CD133+/VEGF-R2+ in control (left) and BRCA mutation positive patient (right).**
